# Supplementary material for: Sol–gel synthesis of DyCrO3and 10% Fe-doped DyCrO3nanoparticles with enhanced photocatalytic hydrogen production abilities
Source: Royal Society of Chemistry journal article supplement (doi:10.1039/c8ra01585f), 2018-01-01
Supplement: c8ra01585f1.pdf [file c8ra01585f1.pdf]

Cite this: DOI: 10.1039/xxxxxxxxxx

## Sol-gel synthesis of DyCrO<sub>3</sub> and 10% Fe-doped DyCrO<sub>3</sub> nanoparticles with enhanced photocatalytic hydrogen production abilities<sup>†</sup>

Ragib Ahsan,<sup>ab</sup> Avijit Mitra,<sup>ab</sup> Saleh Omar,<sup>ab</sup> Md. Ziaur Rahman Khan,<sup>a</sup> and M. A. Basith<sup>b\*</sup>

<sup>a</sup> Department of Electrical and Electronic Engineering, Bangladesh University of Engineering and Technology, Dhaka-1205, Bangladesh

<sup>b</sup> Department of Physics, Bangladesh University of Engineering and Technology, Dhaka-1000, Bangladesh. Email: mabasith@phy.buet.ac.bd

<sup>†</sup> Electronic Supplementary Information (ESI) available: [details of any supplementary information available should be included here]. See DOI: 10.1039/b000000x/

## Electronic supplementary information

### EDS spectra

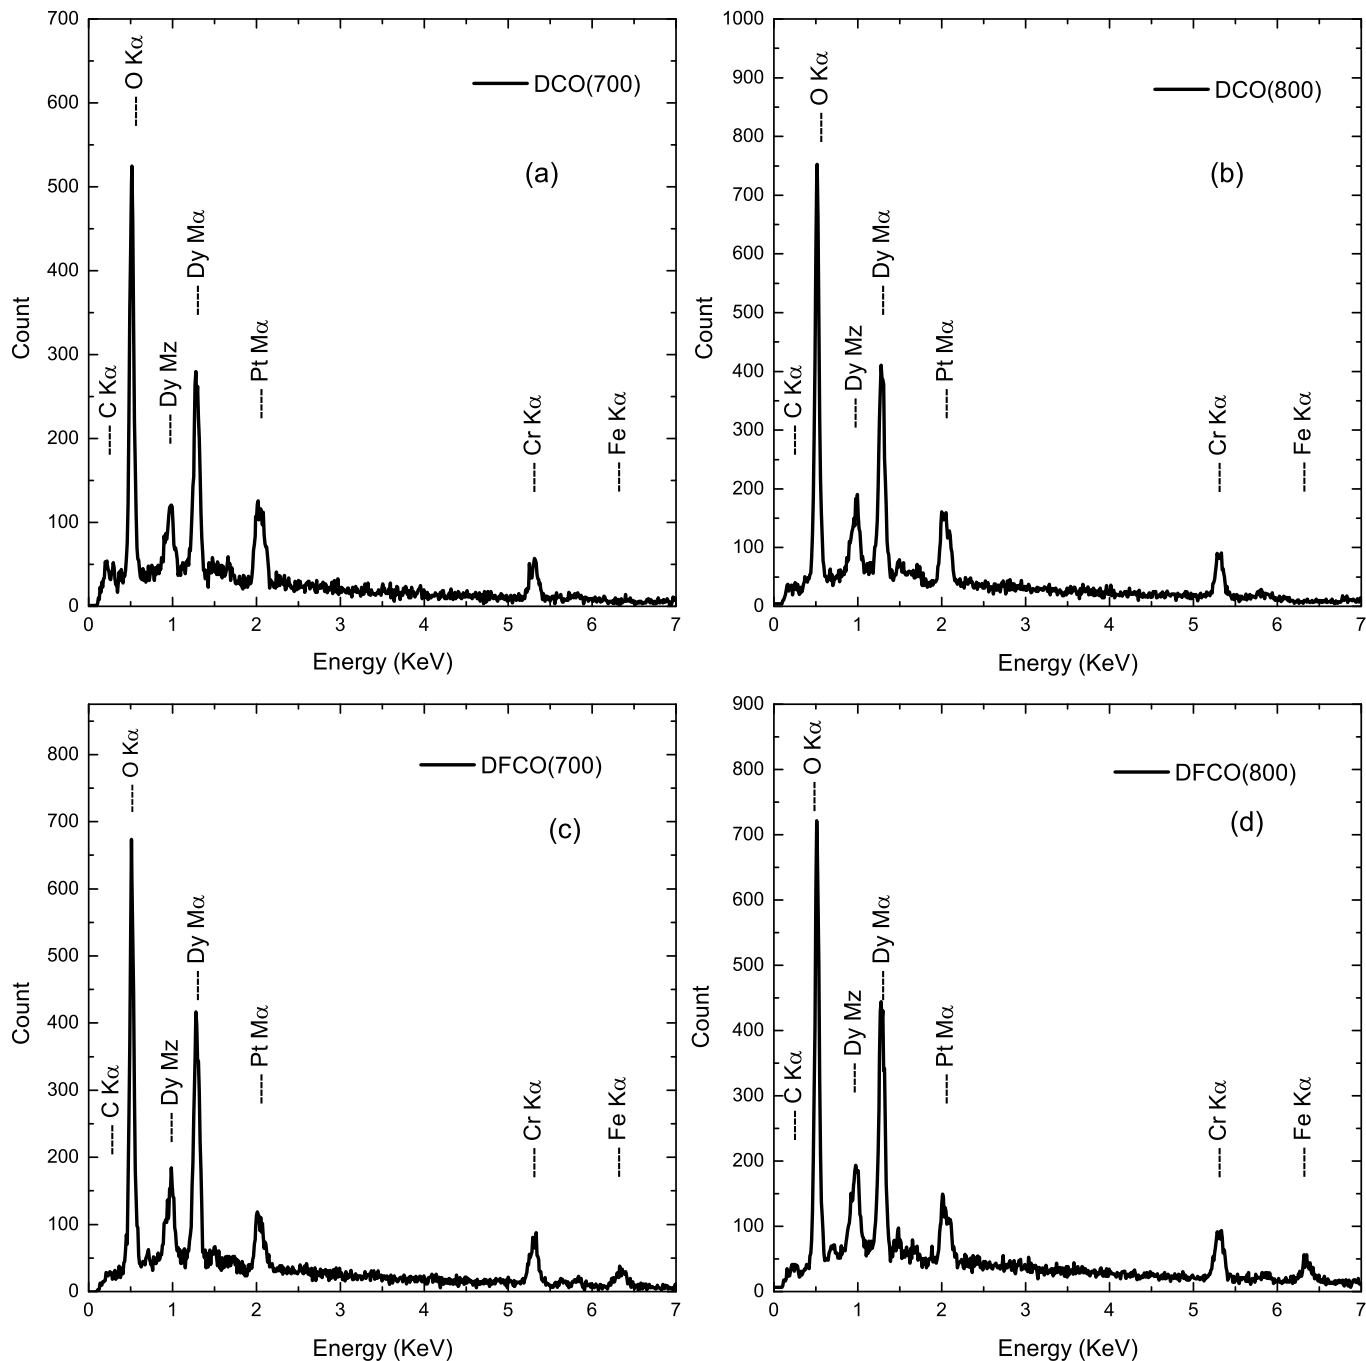

Fig. S1: EDS spectra of (a) DCO(700), (b) DCO(800), (c) DFCO(700), and (d) DFCO(800) nanoparticles

### Calculation of CBM and VBM

Calculation of  $E_{cb}$  requires using the empirical formula<sup>1</sup>:

$$E_{cb} = \chi - E^e - 0.5E_g \quad (1)$$

Here,  $\chi$  is the absolute electronegativity,  $E^e$  is the free electron energy on hydrogen scale (approximately 4.5 eV) and  $E_g$  is the band gap. For compound semiconductors,  $\chi$  can be calculated from the geometric mean of the absolute electronegativity of the constituent

atoms. Calculating  $E_{cb}$  with appropriate values of  $\chi^2$  from equation (1), we can determine  $E_{vb}=E_{cb} + E_g$ . Table S1 lists these calculated values for DCO(700), DCO(800), DFCO(700), and DFCO(800) nanoparticles.

Table S1: Table of  $\chi$ ,  $E_g$ ,  $E_{cb}$  and  $E_{vb}$  of DCO(700), DCO(800), DFCO(700), and DFCO(800) nanoparticles

| Material  | $\chi$ (eV) | $E_g$ (eV) | $E_{cb}$ (eV) | $E_{vb}$ (eV) |
|-----------|-------------|------------|---------------|---------------|
| DCO(700)  | 5.4963      | 2.82       | -0.4287       | 2.33213       |
| DCO(800)  | 5.4963      | 2.72       | -0.3787       | 2.38213       |
| DFCO(700) | 5.5048      | 2.45       | -0.2452       | 2.2548        |
| DFCO(800) | 5.5048      | 2.33       | -0.1631       | 2.1669        |

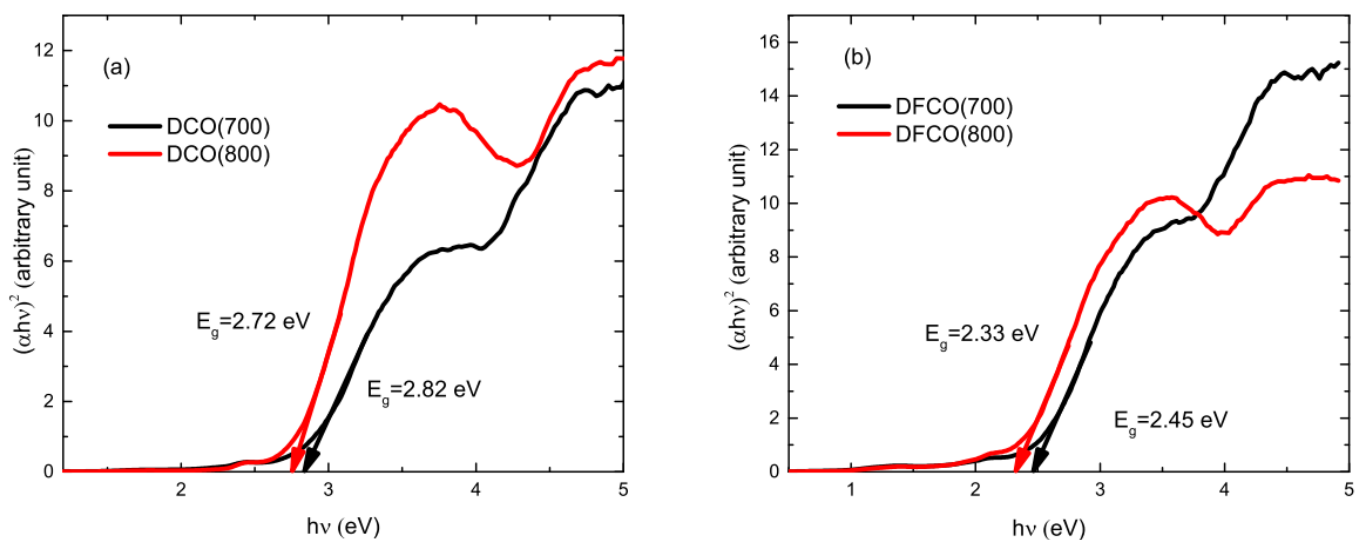

Fig. S2: Tauc plots obtained using modified Kubelka-Munk function from diffuse reflectance spectra for (a) DCO(700) and DCO(800), (b) DFCO(700) DFCO(800)

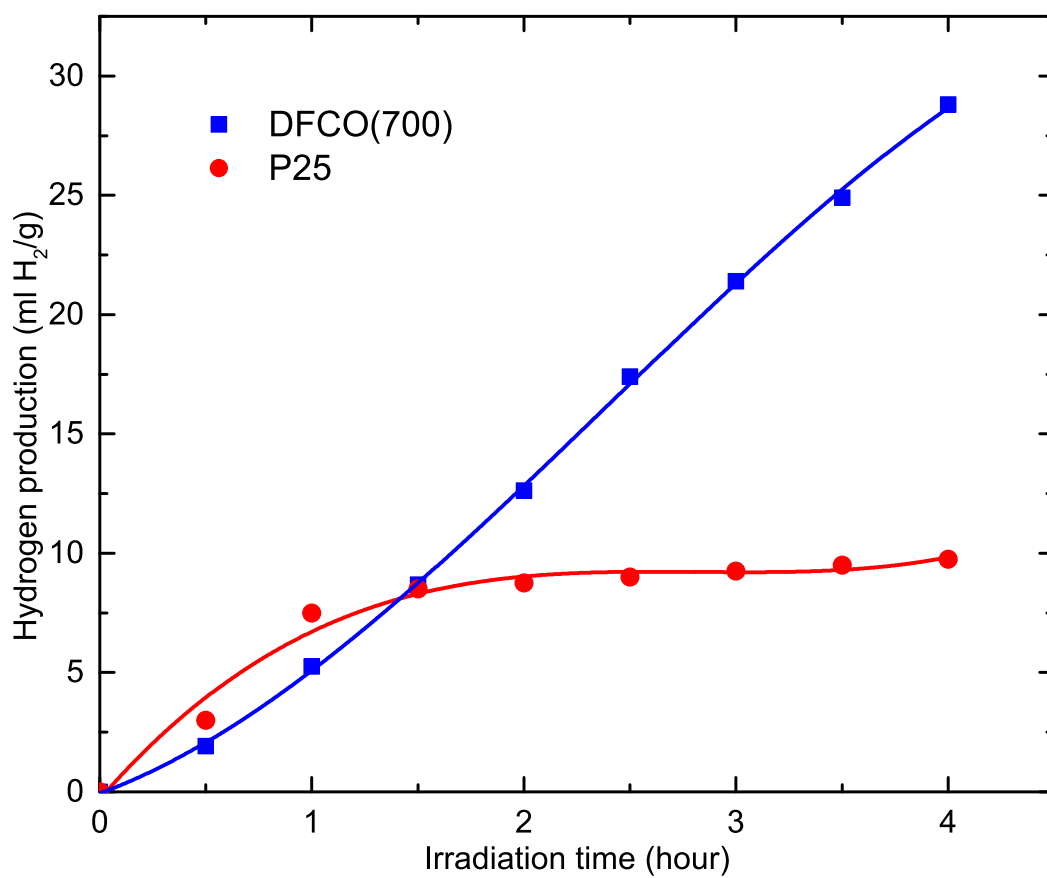

Fig. S3: Normalized photocatalytic hydrogen generation plotted against irradiation time for DFCO(700) and P25 nanoparticles

#### References

- 1 Y. Cui, S. M. Goldup and S. Dunn, RSC Advances, 2015, 5, 30372-30379.
- 2 R. G. Pearson, Inorganic chemistry, 1988, 27, 734-740.
